# Supplementary material
Source: PubMed Central journal article supplement (PMC3473165)

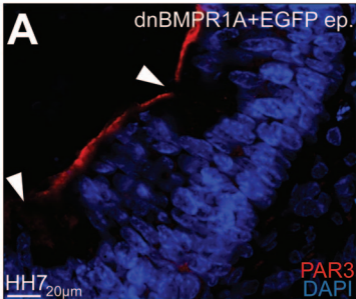

Supplementary Fig S1. Eom et al.,

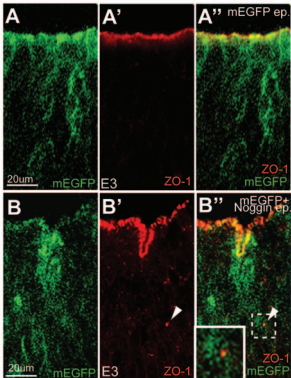

Supplementary Fig S2. Eom et al.,

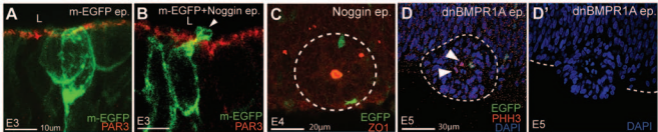

Supplementary Fig S3. Eom et al.,

Supplement: NIHMS402015-supplement-Supp_Fig_S1-S3.pdf [file NIHMS402015-supplement-Supp_Fig_S1-S3.pdf]
